# Supplementary material
Source: PubMed Central journal article supplement (PMC4456288)

Figure 1c

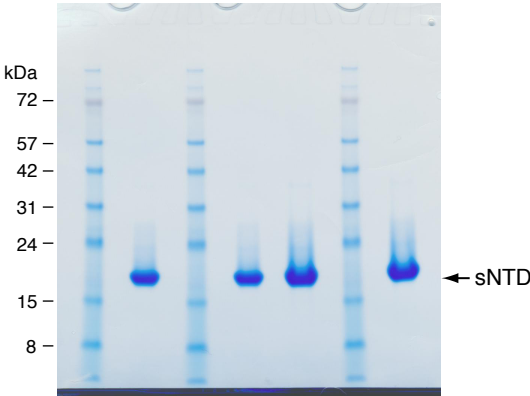

Figure 4a

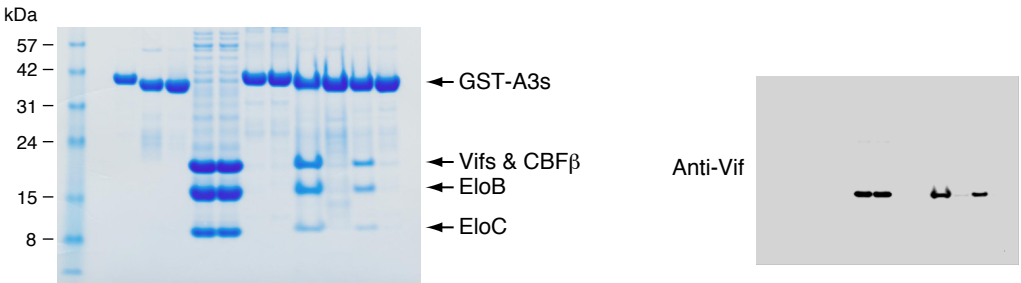

Figure 4c

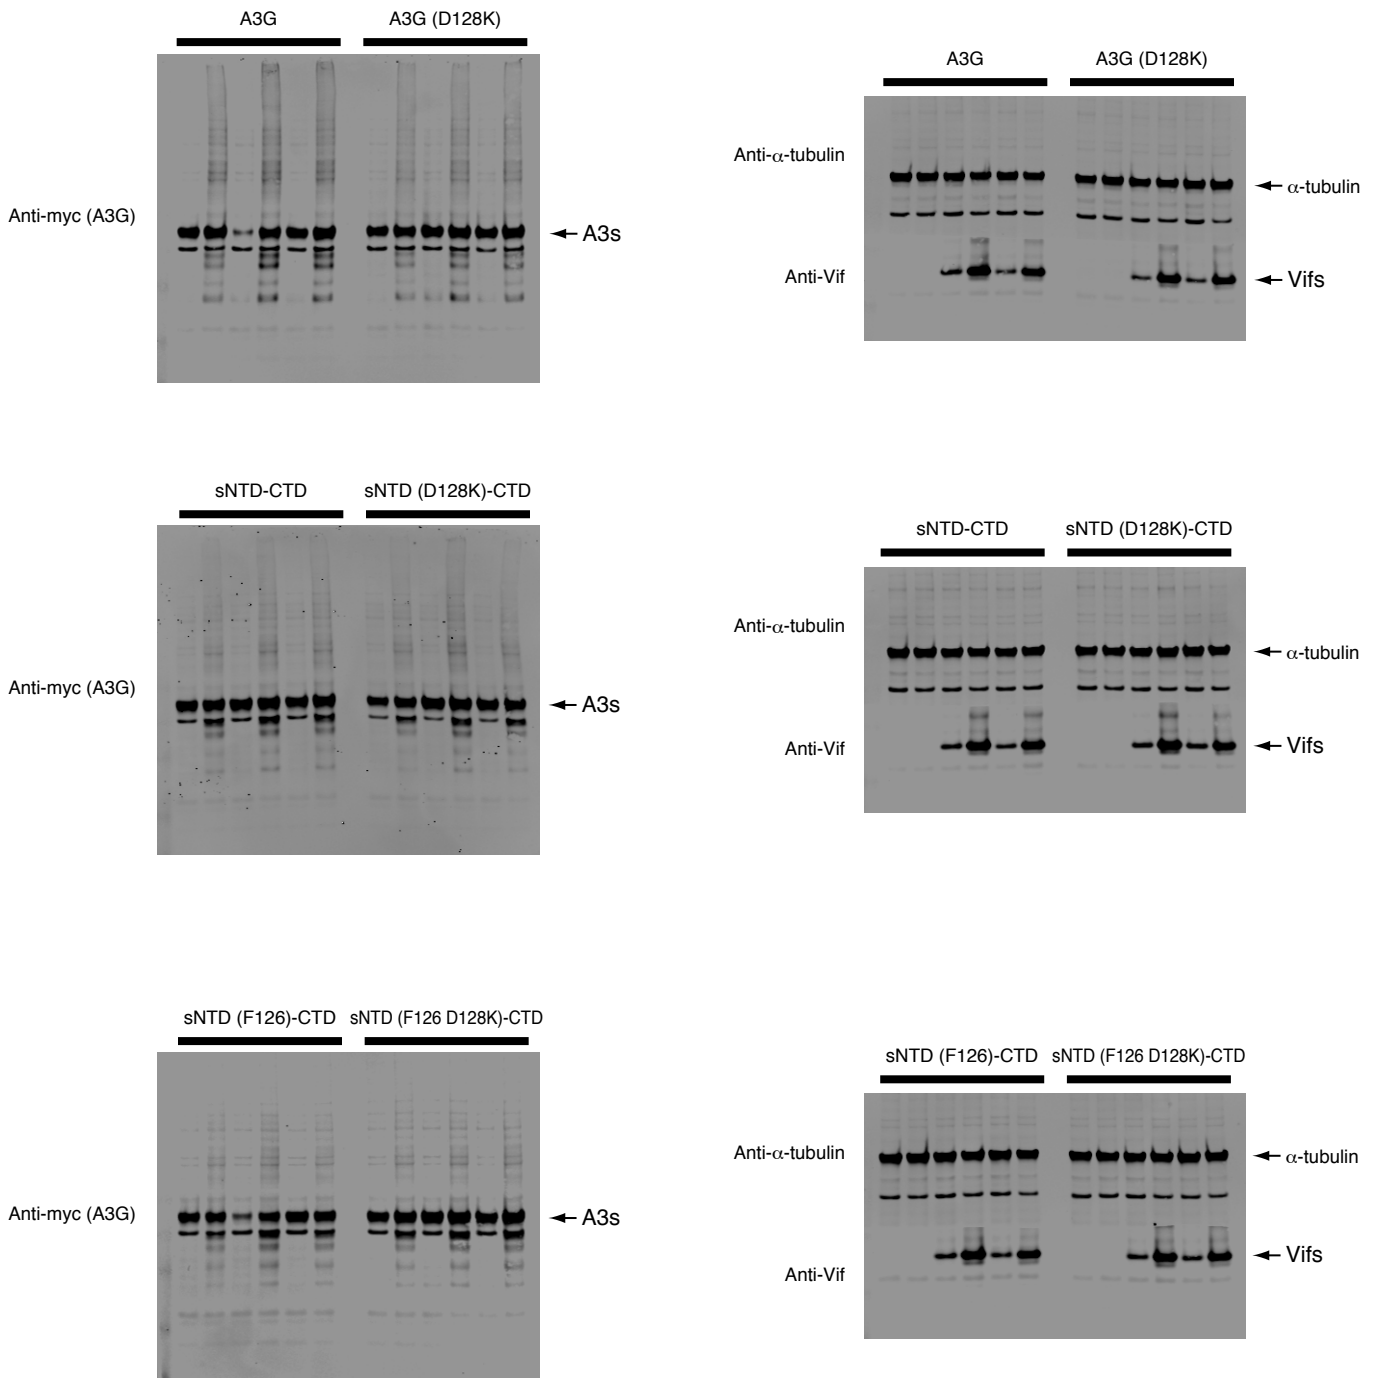

Figure 4d

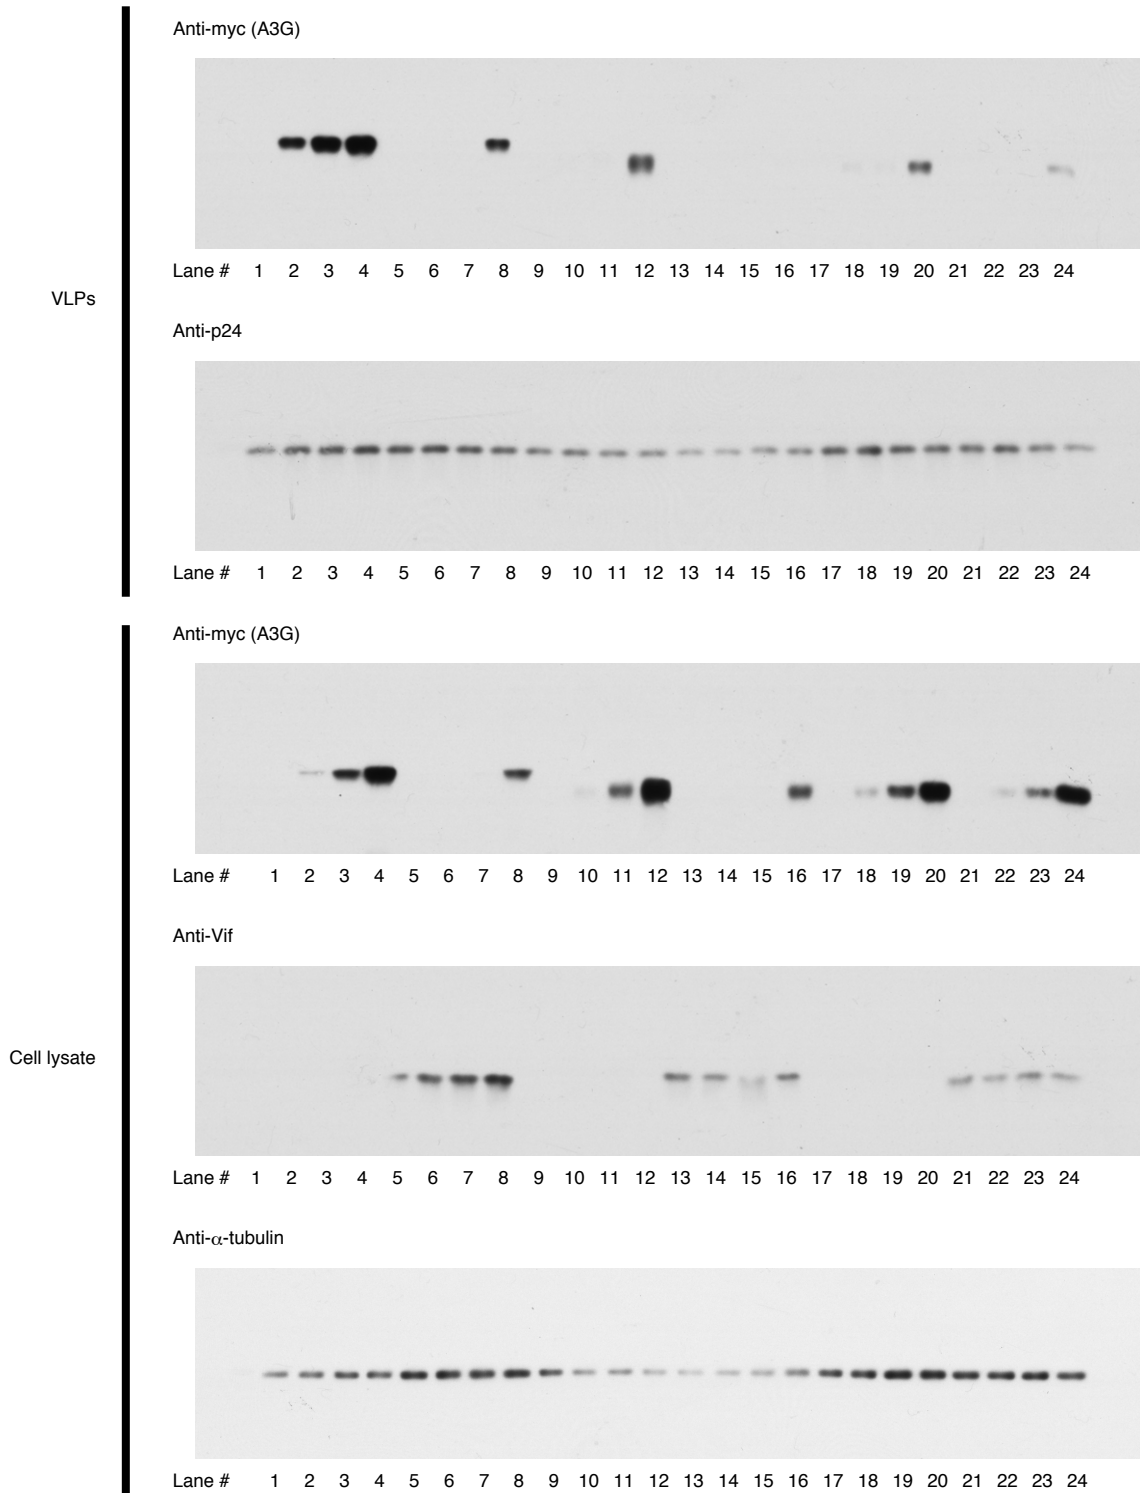

Supplement: NIHMS683750-supplement-1.pdf [file NIHMS683750-supplement-1.pdf]
